# Supplementary material
Source: PubMed Central journal article supplement (PMC9535992)
Supplement: NIHMS1839981-supplement-Supporting_Information.pdf [file NIHMS1839981-supplement-Supporting_Information.pdf]

# Supplementary Material for “A structure-based discovery platform for BACE2 and the development of selective BACE inhibitors”

*Yu-Chen Yen<sup>1</sup>, Annalissa M. Kammeyer<sup>1</sup>, Jagannadharao Tirlangi<sup>2</sup>, Arun K. Ghosh<sup>2,3</sup>, and Andrew D.*

*Mesecar<sup>1,2,4\*</sup>*

<sup>1</sup>Department of Biological Sciences; <sup>2</sup>Department of Chemistry; <sup>3</sup>Department of Medicinal  
Chemistry, <sup>4</sup>Department of Biochemistry, Purdue University, West Lafayette IN 47907

\*Corresponding author: amesecar@purdue.edu

(A)

```

1p   10p   20p   30p   40p   50p   60p 1   10   20   30
MGALARALLPLLAQWLLRAAPELAPAPFTLPLRVAATNRVVAPTGGTPAERHADGLALALEPALASPAGAANFLAMVDNLQGDSDGRGYYLEMIGT
40   50   60   70   80   90   100  110  120  130  140
PPQKLQILVDTGSSNFVAVAGTTPHSYIDTYFDTERSSSTYRSKGFDTVKYTQGSWTGFVGEDLVTIPKGFNTSFLVNIATIFESENFFLPGIKWNGILGLAYATLA
150  160  170  180  190  200  210  220  230  240
KPSSSLETFDFSLVTQANIPNVFSMQMCGAGLPVAGSGTNGGSLVLGGIEPSLYKGDWYTPIKEEWYYQIEILKLEIGGQSLNLDCREYNADKAIVDSGTLL
250  260  270  280  290  300  310  320  330  340  350
RLPQKVFDAVVEAVARASLIPEFSDGFWTGSQLACWNTSETPWSYFPKISYLRDENSSRSFRITILPQLYIQPMMGAGLNYECYRFGISPSTNALVIGATVME
360  370  380  390  400  410  420  430  440  450
GFYVIFDRAQKRVGFAASPCAIEIAGAAVSEISGPFSTEDVASNCVPAQSLSEPIWVIVSYALMSVCGAILLVLIIVLLLLLPPRCQRRPRDPEVVNDESSLVRHRWK

```

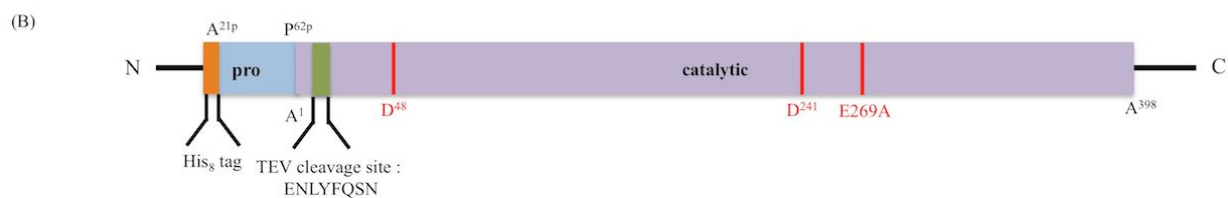

**Figure S1.** (A) The amino acid sequence and (B) expression construct of BACE2. The catalytic Asp residues and the mutation (E269A) made for crystallization are labelled in red.

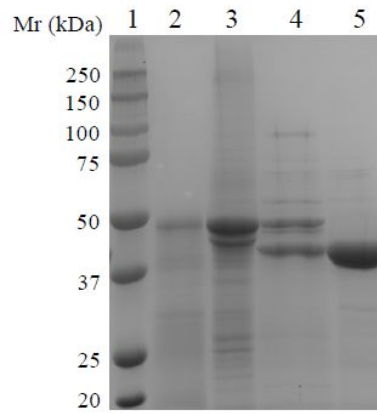

**Figure S2.** SDS-PAGE analysis throughout the purification of BACE2. Lanes: 1, Molecular weight ladder; 2, protein sample after solubilization; 3, BACE2 after refolding where the active protein starts the auto-cleaving process to remove its pro-domain and the molecular weight begins to drop; 4, BACE2 after ammonium sulfate precipitation with partial completion of the auto-catalytic cleaving process; 5, HIC pool showing complete processing to mature and active BACE2.

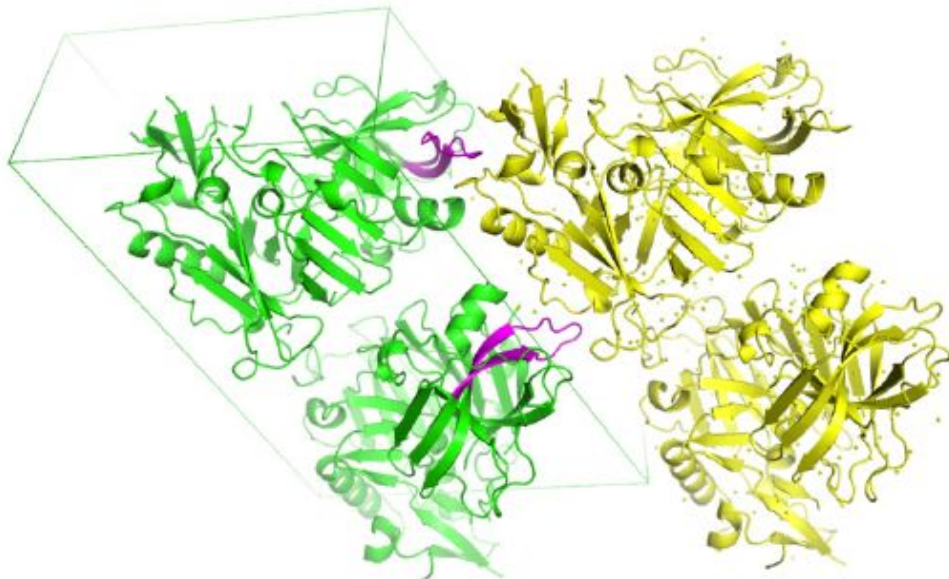

**Figure S3.** Crystal packing of unbound BACE2 (PDB:6UJ0). Molecules colored in green and yellow represent a non-biological, crystallographic dimer in an asymmetric unit. Loop<sup>102-110</sup> is highlighted in magenta in one of the dimer.

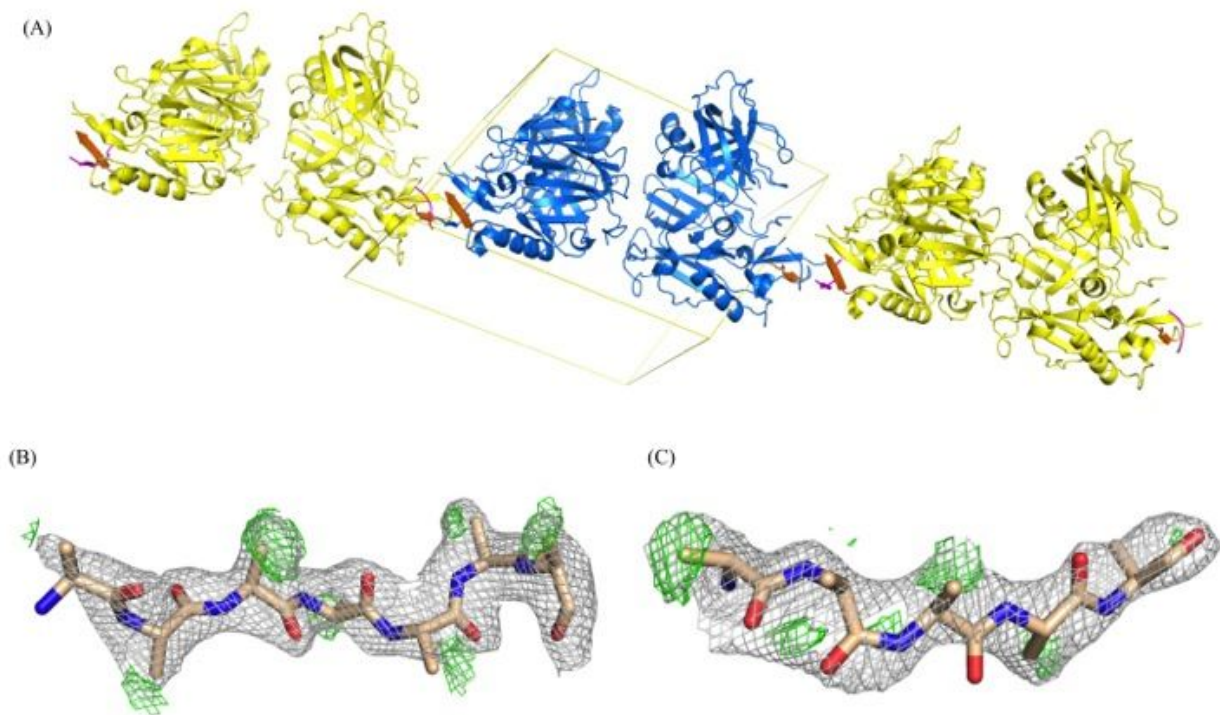

**Figure S4.** Residual electron density is observed in unbound BACE2 structure (PDB:6UJ0) near residues  $^{278}\text{SQLACW}^{283}$ . (A) The crystal packing interfaces of unbound BACE2 are shown near BACE2 residues  $^{278}\text{SQLACW}^{283}$  on each side of the unit cell. Molecules colored in blue and yellow represent non-biological, crystallographic dimers in an asymmetric unit. The residual electron density that was fit with a poly-alanine peptide is highlighted in orange. (B) and (C) The Fo-Fc residual electron density was fit with a seven (B) or five (C)-residue poly-alanine peptide in separate monomers of the asymmetric unit and the resulting 2Fo-Fc map is shown in grey mesh and contoured to  $1.0\ \sigma$  whereas the final resulting Fo-Fc map is shown in green mesh and contoured to  $3.0\ \sigma$ .

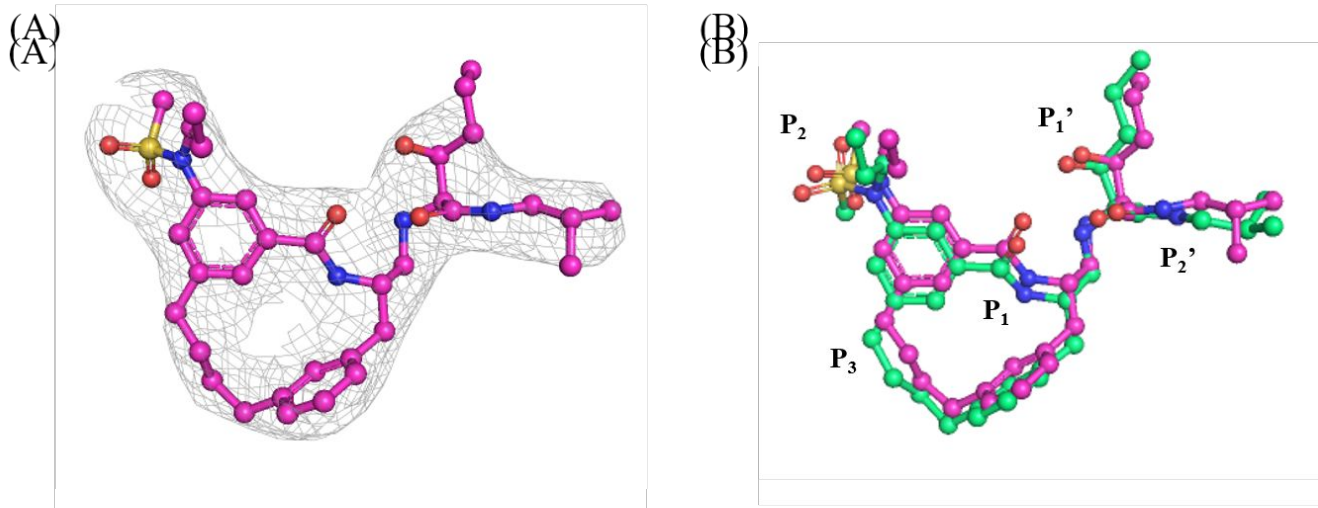

**Figure S5.** (A) Electron density map of inhibitor **3** (shown in stick and colored according to atom types) in the BACE2 active site. The Fo-Fc electron density omit map is contoured to 3.0  $\sigma$  and shown in grey mesh. (B) Overlay of inhibitor **3** in the active site of BACE1 (green sticks, PDB : 6NV7) and BACE2 (magenta sticks, PDB : 6UJ1).

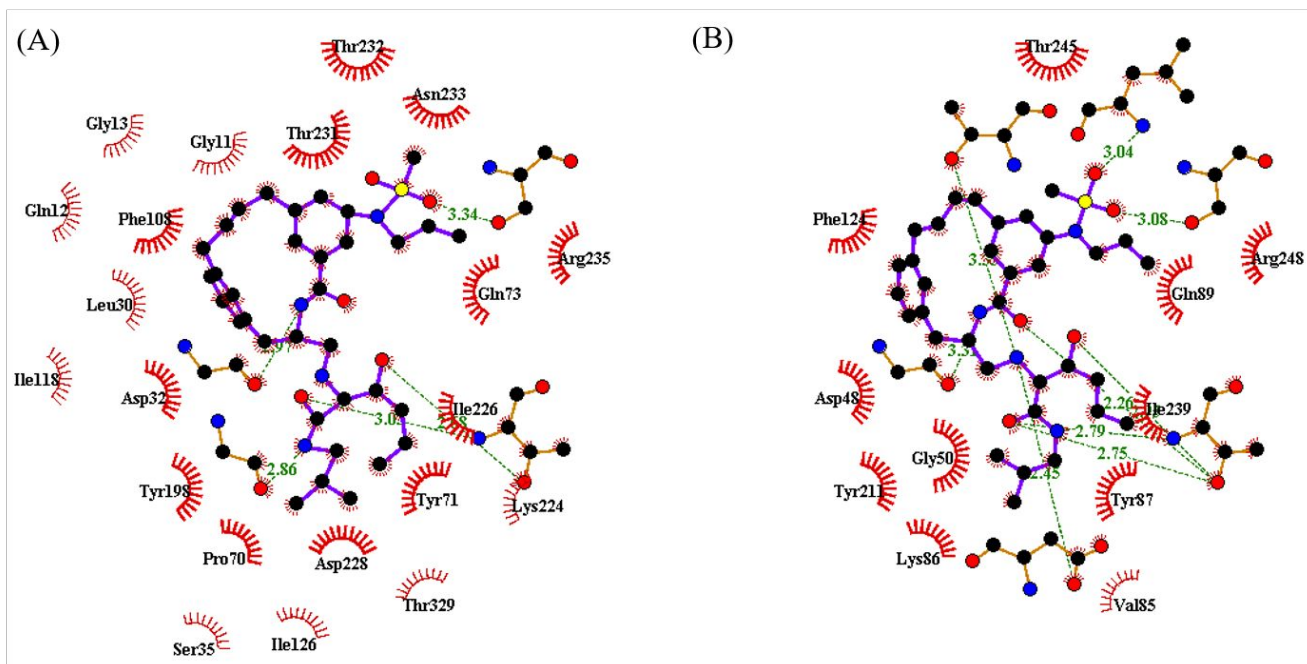

**Figure S6.** Ligand interaction plot of inhibitor **3** with (C) BACE1 and (D) BACE2 generating using LIGPLOT. Inhibitor **3** is shown in blue line and the atoms are colored according to the atom types. The polar contacts are indicated by the dash lines with distances shown in angstroms and the interacting residues are represented in orange line. The residues involved in the hydrophobic interactions are labeled and shown in red hashes.

(A)

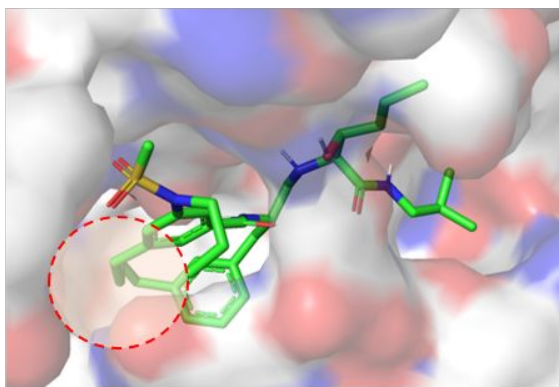

(B)

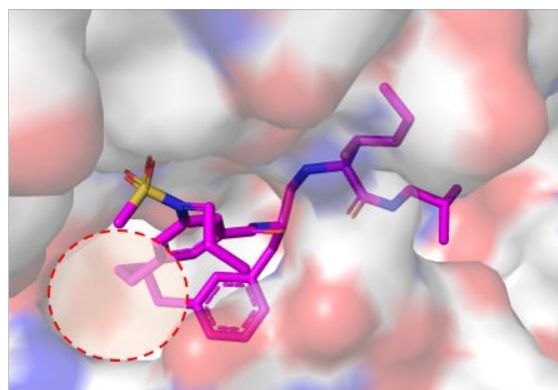

**Figure S7.** Inhibitor **3** in the active site of (A) BACE1 and (B) BACE2. Inhibitor **3** is shown in green and magenta stick and the atoms are colored according to the atom types. BACE1 and BACE2 are shown in surface presentation and colored in grey. The P<sub>1</sub>-P<sub>3</sub> linkage in the S<sub>1</sub>-S<sub>3</sub> pocket is highlighted in the pink circle.



**Table S1.** BACE2 purification from 2 L *E.coli* culture

|                                           | Volume (ml) | Total (mg) | Specific activity<br>( $\mu\text{M}/\text{min}/\text{mg}$ ) | Total unit     |
|-------------------------------------------|-------------|------------|-------------------------------------------------------------|----------------|
| Inclusion Body<br>Solubilized<br>Fraction | 150         | 525        | Not applicable                                              | Not applicable |
| Refold                                    | 40          | 277        | 3                                                           | 837            |
| Ammonium<br>sulfate<br>precipitation      | 40          | 28         | 64                                                          | 1789           |
| HIC                                       | 4.2         | 5          | 330                                                         | 2916           |

**Table S2.** Data collection and refinement statistics

| <i>Data Collection</i>             | <i>Apo-BACE2</i>          | <i>BACE2 in complex with Inhibitor-3</i> |
|------------------------------------|---------------------------|------------------------------------------|
| PDB ID                             | 6UJ0                      | 6UJ1                                     |
| X-ray source and detector          | LRL-CAT<br>Sector 31 ID-D | LRL-CAT<br>Sector 31 ID-D                |
| Wavelength (Å)                     | 0.9793                    | 0.9793                                   |
| Space Group                        | P1                        | P3 <sub>1</sub> 21                       |
| Unit Cell dimensions:              |                           |                                          |
| a, b, c (Å)                        | 46.6, 59.0, 84.6          | 123.07, 123.07, 118.06                   |
| α, β, γ (°)                        | 113.4, 93.7, 96.4         | 90, 90, 120                              |
| <b>Data Processing Statistics</b>  | Overall                   | [Last Shell]                             |
| Resolution range (Å)               | 50-2.15 [2.20-2.15]       | 29-3.03 [3.14-3.03]                      |
| No. reflection recorded            | 405,337                   | 40,834                                   |
| No. averaged reflections           | 44,589                    | 20,418                                   |
| Average Redundancy                 | 2.2                       | 2.0                                      |
| CC <sub>1/2</sub> (%)              | [82.5]                    | [62.1]                                   |
| R <sub>pim</sub> <sup>1</sup>      | [37.2]                    | [47.1]                                   |
| I/σI                               | 17.7 [2.5]                | 11 [1.1]                                 |
| % Completeness                     | 97.6 [97.1]               | 100 [99.9]                               |
| <b>Refinement</b>                  |                           |                                          |
| Resolution Range (Å)               | 50-2.15 [2.20-2.15]       | 29-3.03 [3.14-3.03]                      |
| No. Reflections in Working Set     | 43,480                    | 20,418                                   |
| No. Reflections in Test Set        | 2,198                     | 1,016                                    |
| R <sub>work</sub> (%) <sup>2</sup> | 21.9                      | 24.0                                     |
| R <sub>free</sub> (%)              | 25.7                      | 29.0                                     |
| Average B-factor (Å <sup>2</sup> ) | 46.0                      | 114.7                                    |
| RMSD from ideal geometry:          |                           |                                          |
| Bond Lengths (Å)                   | 0.008                     | 0.019                                    |
| Bond Angles (degrees)              | 0.846                     | 1.564                                    |
| Ramachandran Plot                  |                           |                                          |
| Most Favored (%)                   | 97.78                     | 94.30                                    |
| Allowed (%)                        | 2.08                      | 5.27                                     |
| Disallowed (%)                     | 0.14                      | 0.43                                     |

<sup>1</sup>  $R_{pim} = \sum_{hkl} \sqrt{1/n - 1} \sum_i |I_i(hkl) - \langle I(hkl) \rangle| / \sum_{hkl} \sum_i I_i(hkl)$ , where n is the multiplicity.

<sup>2</sup>  $R_{work} = \sum_{hkl} ||F_{obs}| - |F_{calc}|| / \sum_{hkl} |F_{obs}|$ , where  $F_{obs}$  and  $F_{calc}$  are the observed and calculated structure factors, respectively.

**Table S3.** Comparison of BACE2 structures crystallized under different conditions and space group

| PDB         | Construct | Crystallization Chaperone Protein | inhibitor | Resolution (Å) | Space group                                   | Flap orientation <sup>4</sup> |
|-------------|-----------|-----------------------------------|-----------|----------------|-----------------------------------------------|-------------------------------|
| 2EWY        | Wild type | No                                | Yes       | 3.1            | H3                                            | Closed                        |
| <b>6UJ1</b> | E269A     | No                                | Yes       | 3.0            | P3 <sub>1</sub> 2 <sub>1</sub>                | Closed                        |
| 3ZKI        | E269A     | No                                | Yes       | 2.4            | P2 <sub>1</sub>                               | Open                          |
| 3ZKG        | E269A     | No                                | No        | 1.9            | P2 <sub>1</sub>                               | Open                          |
| <b>6UJ0</b> | E269A     | No                                | No        | 2.1            | P1                                            | Closed                        |
| 3ZKN        | Wild type | Fab <sup>1</sup>                  | Yes       | 2.0            | P2 <sub>1</sub>                               | Open                          |
| 3ZKM        | Wild type | Fab                               | No        | 1.8            | P2 <sub>1</sub> 2 <sub>1</sub> 2 <sub>1</sub> | Closed                        |
| 3ZKQ        | Wild type | Xaperone <sup>2</sup>             | No        | 1.5            | P2 <sub>1</sub> 2 <sub>1</sub> 2 <sub>1</sub> | Open                          |
| 3ZKS        | Wild type | Xaperone                          | Yes       | 2.1            | P2 <sub>1</sub> 2 <sub>1</sub> 2 <sub>1</sub> | Open                          |
| 4BEL        | Wild type | Xaperone                          | No        | 1.8            | P2 <sub>1</sub>                               | Open                          |
| 4BFB        | Wild type | Xaperone                          | No        | 2.2            | P2 <sub>1</sub> 2 <sub>1</sub> 2 <sub>1</sub> | Closed                        |
| 6JSZ        | Wild type | Xaperone                          | Yes       | 1.5            | P2 <sub>1</sub> 2 <sub>1</sub> 2 <sub>1</sub> | Open                          |
| 3ZKX        | E269A     | Xaperone                          | No        | 2.4            | I222                                          | Closed                        |
| 3ZLQ        | E269A     | Xaperone                          | Yes       | 2.1            | P2 <sub>1</sub>                               | Open                          |
| 3ZL7        | E269A     | Fynomer <sup>3</sup>              | No        | 3.2            | P4 <sub>3</sub> 2 <sub>1</sub> 2              | Closed                        |

<sup>1</sup> BACE2-binding antibody Fab fragments

<sup>2</sup> Single domain camelid antibody V<sub>H</sub>H fragments

<sup>3</sup> Fyn-kinase-derived SH3 domains

<sup>4</sup> Structures were superimposed to the unbound BACE2 (PDB: 2EWY) using pymol and the movement of the flap loop is determined by measuring the distance of Thr88 C $\alpha$  atoms between the structures and unbound BACE2. Structures that move more than 2 Å in the flap loop are defined as open conformations.
